# Supplementary material
Source: publisher site journal article supplement (https://www.spandidos-publications.com/5110/downloadSupplementary)
Supplement: Supplementary file 1 [file downloadSupplementary]

## Sheet: Table S13
Table SXIII. The P-value of DNase expression and the immune score in different cancer types.
Cancer type	DNASE1	DNASE1L1	DNASE1L2	DNASE1L3	DNASE2	DNASE2B
ACC	0.0146517	0.604174	1.21456e-07	0.000939025	0.689635	0.420091
BLCA	4.572e-09	0.336066	8.561e-11	2.03223e-32	0.00290311	0.222842
BRCA	2.29009e-08	8.50057e-05	1.78544e-06	6.00464e-75	0.000685691	2.22122e-09
CESC	0.0042355	0.76512	0.00103442	2.5672e-12	0.00214774	2.3064e-05
CHOL	0.291095	0.577237	0.94566	0.0686402	0.664218	0.0215937
COAD	1.72316e-08	0.0273284	0.1621	4.49415e-17	5.56447e-09	0.56246
DLBC	0.0800256	0.0202201	0.000245429	0.000298197	7.7293e-06	0.000841359
ESCA	0.364234	0.982148	0.76119	0.030892	0.129817	0.000505536
GBM	4.42531e-11	0	8.28842e-05	0.00267688	0	0.376532
HNSC	0.533767	0.600649	0.870859	3.14599e-16	0.0019499	2.10982e-17
KICH	0.981338	0.0325203	0.0344126	0.00200426	0.445984	0.00737361
KIRC	0.277908	0.418163	0.278204	0.598963	0	1.30661e-24
KIRP	9.51347e-07	0.502768	0.00110436	7.69049e-12	0	3.27154e-29
LAML	0.202187	0	0.169779	0.012157	0.329109	0.0631516
LGG	2.38142e-08	0	6.94786e-05	0.00239663	0	1.11289e-28
LIHC	0.957325	0.188321	0.000940033	0.0142302	0.130914	1.969e-11
LUAD	0.00109163	0.000572872	0.612681	3.05432e-23	0	4.42665e-33
LUSC	0.00114548	4.96684e-06	0.194354	0.00208621	0.000235513	3.58412e-32
MESO	6.91029e-05	0.243358	0.789462	1.46729e-05	0.136366	7.77607e-06
OV	1.15483e-05	4.54342e-08	0.137014	2.08564e-20	0.00465069	2.41941e-07
PAAD	0.0131628	0.00791044	1.24279e-06	0	0.00760363	3.10196e-09
PCPG	6.64488e-07	0.0312982	0.275012	3.45808e-06	0.951336	3.80266e-06
PRAD	5.42542e-05	1.61653e-05	0.909286	0	3.83953e-11	8.86314e-09
READ	0.000704675	0.00846771	0.751628	1.45058e-08	0.003158	0.694109
SARC	0	8.69951e-05	0.0125101	2.13717e-10	1.10648e-11	1.00113e-05
SKCM	0.0303737	0.0168294	0.184745	4.32042e-49	1.63712e-11	0.00164872
STAD	0.0049853	0.286193	0.000324605	0	5.01016e-13	1.51841e-10
TGCT	0.662657	0.0615466	0.0214432	0	0	2.65867e-23
THCA	0.000948808	3.60491e-06	0.000370611	3.86054e-06	3.57605e-12	4.27657e-21
THYM	0.174655	0.443128	0.0297244	0	0.0336723	0.392606
UCEC	0.0385681	0.351782	0.747135	5.25532e-42	0.335494	2.17632e-07
UCS	0.0148139	0.0479231	0.100596	0.0175508	0.0156209	0.455959
UVM	0.0819398	0.0890093	0.72825	0	9.21006e-08	2.57142e-06
